# Supplementary material for: Alcohol consumption has a J-shaped association with bacterial infection and death due to infection, a population-based cohort study
Source: Springer Nature journal article supplement (doi:10.1038/s41598-025-90197-8), 2025-03-01
Supplement: MOESM1 [file 41598_2025_90197_MOESM1_ESM.pdf]

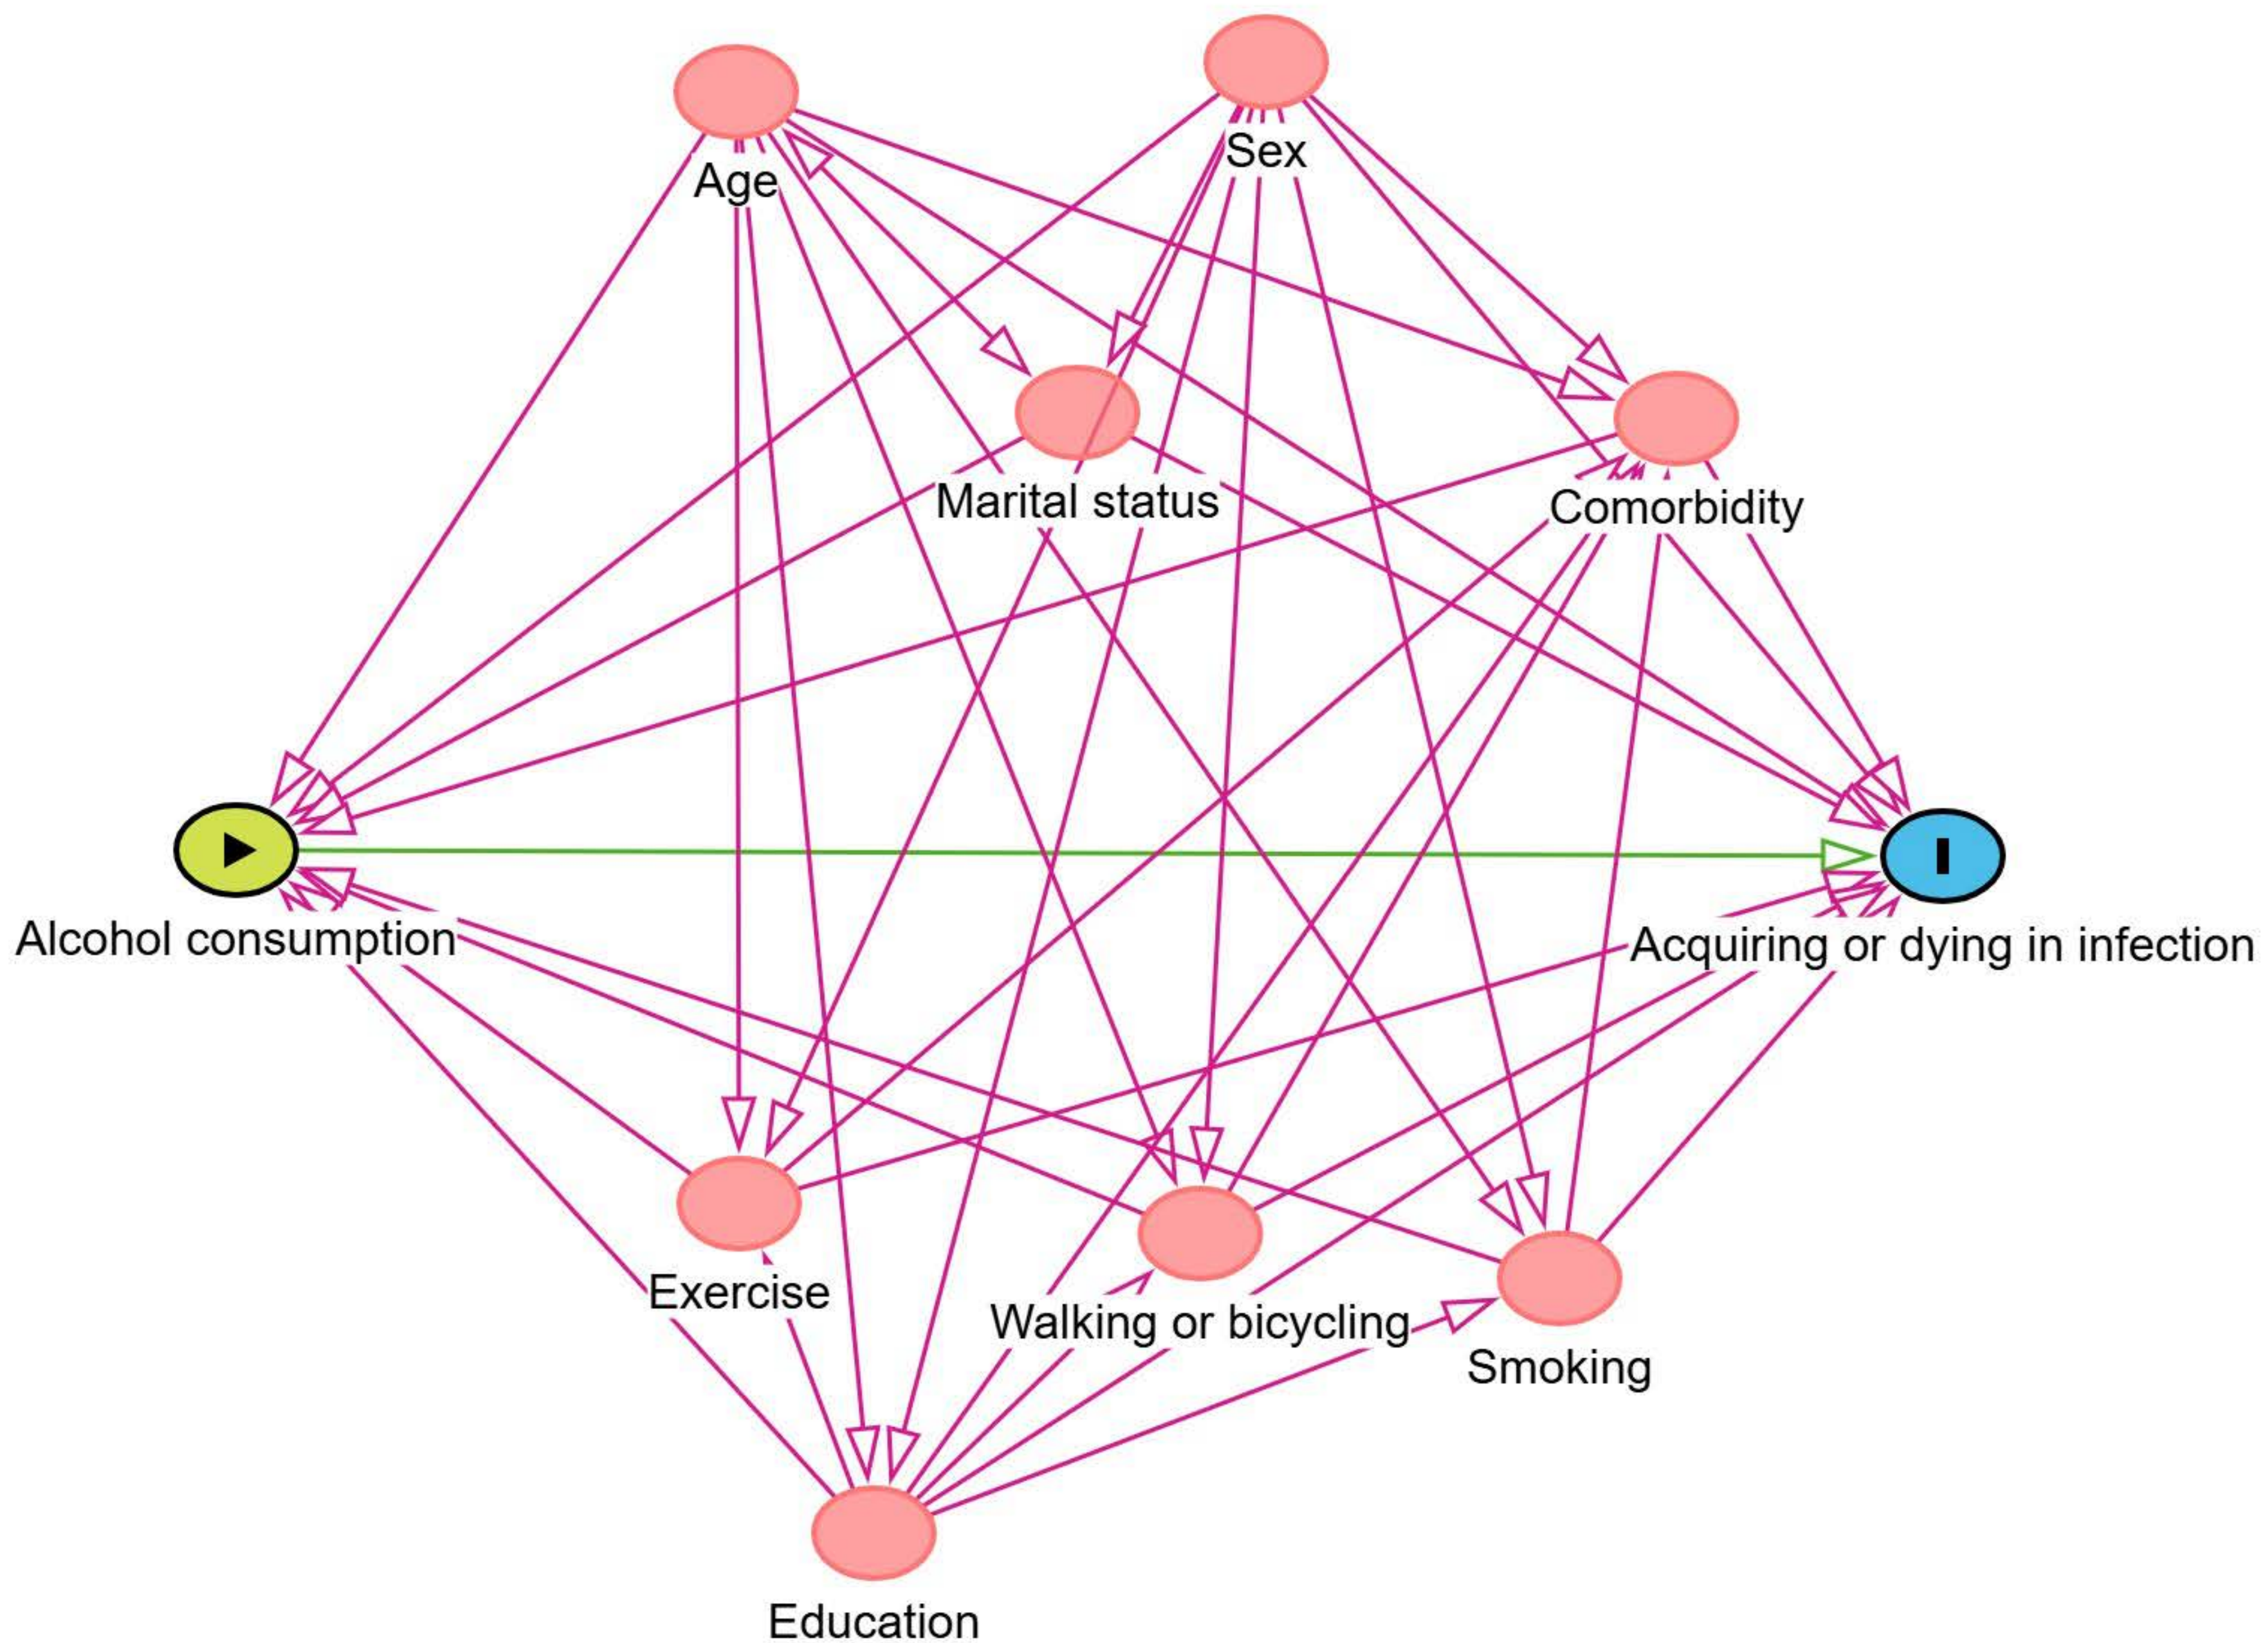

Supplemental Figure 1: Directed Acyclic Graph describing causal assumptions underlying the main analysis.
